# Supplementary material
Source: publisher figshare collection journal article supplement (https://frontiersin.figshare.com/ndownloader/files/31279156)
Supplement: Supplementary file 1 [file 31279156]

**Supplementary Information for**

**Rapid northwestward extension of the East Asian summer monsoon since the last deglaciation: Evidence from the mollusk record**

Yajie Dong1*, Naiqin Wu1*, Fengjiang Li1, 2, 3, Houyuan Lu1, 4

* Yajie Dong; Naiqin Wu

Email: dongyajie@mail.iggcas.ac.cn (Yajie Dong); nqwu@mail.iggcas.ac.cn (Naiqin Wu)

**This file includes:**

Figures S1 to S2


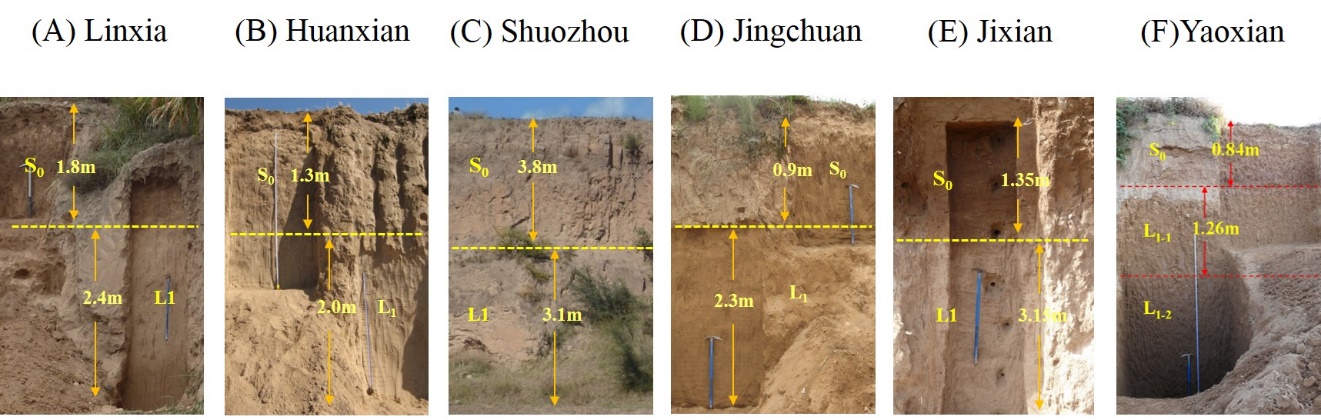


Fig. S1. Field photographs showing the studies loess sequences since the last glacial maximum: Linxia (A), Huanxian (B), Shuozhou (C), Jingchuan (D), Jixian (E), and Yaoxian (F). Dotted lines and solid arrows indicate the L1/S0 boundary and corresponding stratigraphic depths.

Fig. S2. Pedostratigraphy, magnetic susceptibility and absolute ages versus depth for the loess sections at Yaoxian (A), Jingchuan (B), Huanxian (C), Shuozhou (D), and Jixian (E) since the last glacial (Dong et al., 2015, 2021a).
